# Supplementary material for: Far-red emission carbon dot–metal organic frameworks composite for plant growth regulation application
Source: Royal Society of Chemistry journal article supplement (doi:10.1039/d3tc02585c), 2023-01-01
Supplement: d3tc02585c1.pdf [file d3tc02585c1.pdf]

## Supporting Informations

# Far-Red Emission Carbon Dot-Metal Organic Frameworks Composite for Plant Growth Regulation Application

Shixin Wu<sup>1</sup>, Chaowei Yang<sup>1</sup>, Jiechun Zhuang<sup>1</sup>, Jiahao Chen<sup>1</sup>, Wei Li<sup>1</sup>, Yingliang Liu<sup>1</sup>, Mingtao Zheng<sup>1,2</sup>, Xuejie Zhang<sup>1,2</sup>, Bingfu Lei<sup>1,2,†</sup>, Yuxia Guo<sup>3</sup>, and Haoran Zhang<sup>1,2,†</sup>

<sup>1</sup> Key Laboratory for Biobased Materials and Energy of Ministry of Education, College of Materials and Energy, South China Agricultural University, Guangzhou 510642, P. R. China

<sup>2</sup> Maoming Branch, Guangdong Laboratory for Lingnan Modern Agriculture, Guangdong Maoming 525100, P. R. China

<sup>3</sup> Guangdong Engineering Polytechnic, Guangzhou 510520, P. R. China

---

† Corresponding authors: tleibf@scau.edu.cn (Bingfu Lei), hrzhang@scau.edu.cn (Haoran Zhang)

## Supporting Figures

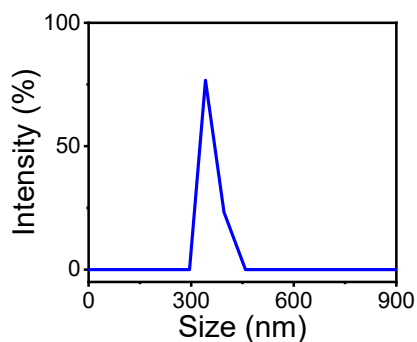

**Figure S1.** Hydrodynamic diameter mapping of pCDs.

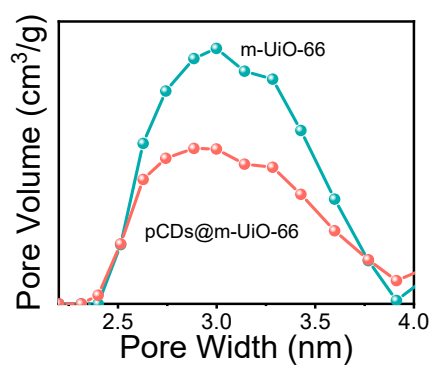

**Figure S2.** Pore size distribution plots of m-UiO-66 and pCDs@m-UiO-66.

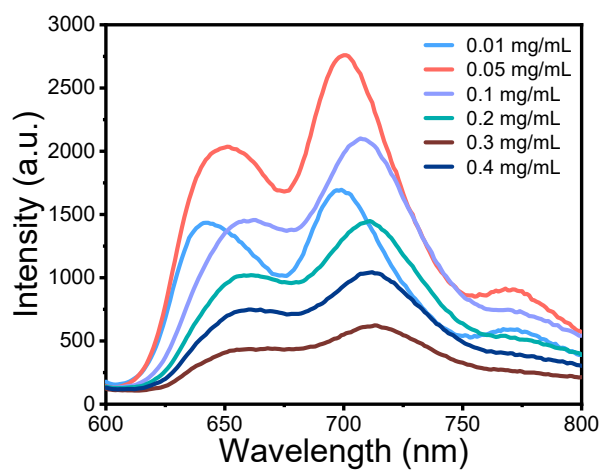

**Figure S3.** Fluorescence spectra of doping with different concentrations of carbon dots.

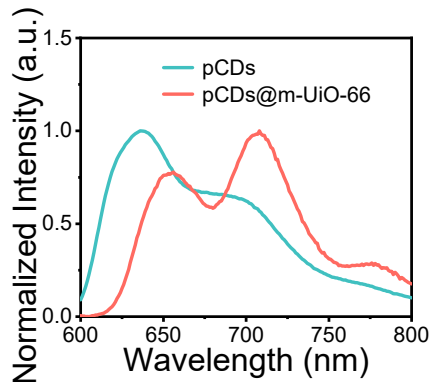

**Figure S4.** Fluorescence spectra of pCDs and pCDs@m-UiO-66 at the same excitation wavelength.

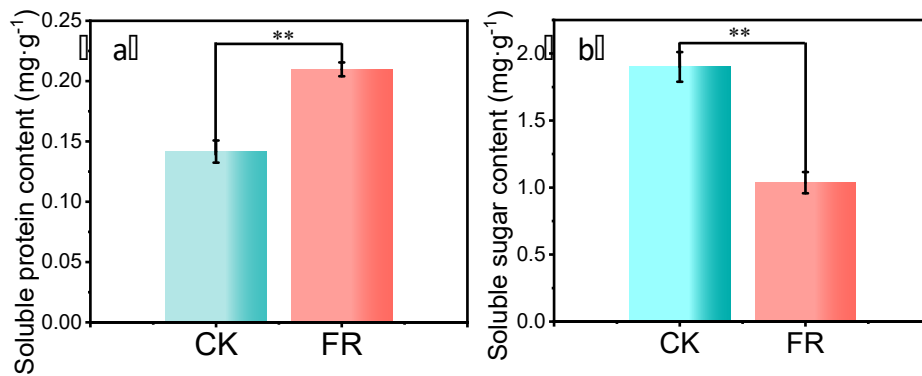

**Figure S5.** (a) soluble protein and (b) soluble sugar content of Italian lettuce.

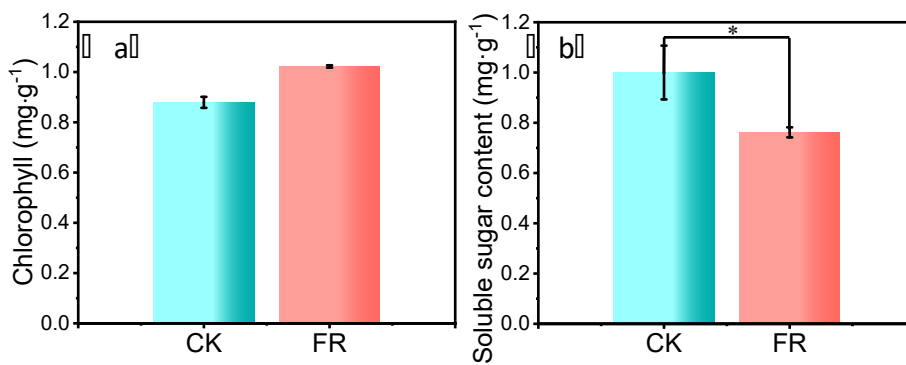

**Figure S6.** (a) Chlorophyll, (b) soluble sugar content of drench beet seedlings.
